# Supplementary material for: A series of coordination polymers constructed by the semi-rigid bifunctional ligand 5-((1H-1,2,4-triazol-1-yl)methoxy) isophthalic acid: syntheses, structures and the role of solvents
Source: Royal Society of Chemistry journal article supplement (doi:10.1039/c3ce42048e), 2013-12-20
Supplement: c3ce42048e.pdf [file c3ce42048e.pdf]

## Electronic supplementary information

### **A series of coordination polymers constructed by semi-rigid bifunctional ligand 5-((1H-1,2,4-triazol-1-yl)methoxy) isophthalic acid: syntheses, structures and role of solvents**

**Yan Yang,<sup>a</sup> Jin Yang,<sup>a</sup> Peng Du,<sup>a</sup> Ying-Ying Liu<sup>\*ab</sup> and Jian-Fang Ma<sup>\*a</sup>**

<sup>a</sup> *Key Lab of Polyoxometalate Science, Department of Chemistry, Northeast Normal University, Changchun 130024, People's Republic of China*

<sup>b</sup> *Key Laboratory of Preparation and Applications of Environmental Friendly Materials, Ministry of Education, Department of Chemistry, Siping 136000, China*

Correspondence authors

E-mail: liuyy147@nenu.edu.cn (Y.-Y Liu)

E-mail: majf247@yahoo.com (J.-F. Ma)

Fax: +86-431-85098620 (J.-F. Ma)

**Table S1a.** Selected bond distances (Å) and angles (°) for **1**.

|                                              |            |                               |          |
|----------------------------------------------|------------|-------------------------------|----------|
| Cu(1)-O(1)                                   | 1.9219(16) | Cu(1)-N(3) <sup>#2</sup>      | 2.016(2) |
| O(1) <sup>#1</sup> -Cu(1)-N(3) <sup>#2</sup> | 91.33(8)   | O(1)-Cu(1)-N(3) <sup>#2</sup> | 88.67(8) |

Symmetry transformations used to generate equivalent atoms: <sup>#1</sup> -x, -y+1, -z+1; <sup>#2</sup> -x+1, -y+1, -z+1.

**Table S1b.** Hydrogen bonds for **1** (Å and °).

| D-H...A                        | d(D-H) | d(H...A) | d(D...A) | <(DHA) |
|--------------------------------|--------|----------|----------|--------|
| O(3)-H(3)...O(2) <sup>#5</sup> | 0.82   | 1.83     | 2.625(2) | 162.1  |

Symmetry transformations used to generate equivalent atoms: <sup>#5</sup> -x, y+1/2, -z+1/2.

**Table S2a.** Selected bond distances (Å) and angles (°) for **2**.

|                               |            |                               |          |
|-------------------------------|------------|-------------------------------|----------|
| Cu(1)-O(1)                    | 1.9402(16) | Cu(1)-N(3) <sup>#2</sup>      | 1.983(2) |
| O(1)-Cu(1)-N(3) <sup>#3</sup> | 88.91(8)   | O(1)-Cu(1)-N(3) <sup>#2</sup> | 91.09(8) |

Symmetry transformations used to generate equivalent atoms: <sup>#2</sup> x+1, y, z; <sup>#3</sup> -x+1, -y, -z+2.

**Table S2b.** Hydrogen bonds for **2** (Å and °).

| D-H...A                         | d(D-H) | d(H...A) | d(D...A) | <(DHA) |
|---------------------------------|--------|----------|----------|--------|
| O(4)-H(4A)...O(6) <sup>#5</sup> | 0.82   | 1.77     | 2.550(3) | 158.0  |
| C(9)-H(9A)...O(3) <sup>#6</sup> | 0.97   | 2.28     | 3.143(3) | 148.2  |

Symmetry transformations used to generate equivalent atoms: <sup>#5</sup> -x+2, -y-1, -z+1; <sup>#6</sup> x-1, y+1, z.

**Table S3a.** Selected bond distances (Å) and angles (°) for **3**.

|                                              |            |                                              |            |
|----------------------------------------------|------------|----------------------------------------------|------------|
| Co(1)-O(1)                                   | 2.024(3)   | Co(1)-O(9) <sup>#1</sup>                     | 2.065(3)   |
| Co(1)-O(6)                                   | 2.095(3)   | Co(1)-O(4) <sup>#2</sup>                     | 2.155(3)   |
| Co(1)-O(3) <sup>#2</sup>                     | 2.156(2)   | Co(1)-N(3) <sup>#3</sup>                     | 2.162(4)   |
| Co(2)-O(2)                                   | 2.017(3)   | Co(2)-O(8) <sup>#1</sup>                     | 2.031(3)   |
| Co(2)-O(11)                                  | 2.051(3)   | Co(2)-O(6)                                   | 2.098(3)   |
| Co(2)-N(6) <sup>#4</sup>                     | 2.124(4)   |                                              |            |
| O(1)-Co(1)-O(9) <sup>#1</sup>                | 94.44(13)  | O(1)-Co(1)-O(6)                              | 97.12(12)  |
| O(9) <sup>#1</sup> -Co(1)-O(6)               | 86.71(13)  | O(1)-Co(1)-O(4) <sup>#2</sup>                | 103.92(12) |
| O(9) <sup>#1</sup> -Co(1)-O(4) <sup>#2</sup> | 89.31(13)  | O(6)-Co(1)-O(4) <sup>#2</sup>                | 158.82(10) |
| O(1)-Co(1)-O(3) <sup>#2</sup>                | 165.12(13) | O(9) <sup>#1</sup> -Co(1)-O(3) <sup>#2</sup> | 84.22(12)  |

|                                              |            |                                              |            |
|----------------------------------------------|------------|----------------------------------------------|------------|
| O(6)-Co(1)-O(3) <sup>#2</sup>                | 97.60(11)  | O(4) <sup>#2</sup> -Co(1)-O(3) <sup>#2</sup> | 61.29(11)  |
| O(1)-Co(1)-N(3) <sup>#3</sup>                | 90.49(13)  | O(9) <sup>#1</sup> -Co(1)-N(3) <sup>#3</sup> | 175.03(13) |
| O(6)-Co(1)-N(3) <sup>#3</sup>                | 93.36(13)  | O(4) <sup>#2</sup> -Co(1)-N(3) <sup>#3</sup> | 88.85(13)  |
| O(3) <sup>#2</sup> -Co(1)-N(3) <sup>#3</sup> | 90.85(12)  | O(2)-Co(2)-O(8) <sup>#1</sup>                | 94.30(14)  |
| O(2)-Co(2)-O(11)                             | 87.97(14)  | O(8) <sup>#1</sup> -Co(2)-O(11)              | 96.46(14)  |
| O(2)-Co(2)-O(6)                              | 92.98(12)  | O(8) <sup>#1</sup> -Co(2)-O(6)               | 103.17(12) |
| O(11)-Co(2)-O(6)                             | 160.22(14) | O(2)-Co(2)-N(6) <sup>#4</sup>                | 174.71(15) |
| O(8) <sup>#1</sup> -Co(2)-N(6) <sup>#4</sup> | 90.85(15)  | O(11)-Co(2)-N(6) <sup>#4</sup>               | 90.28(14)  |
| O(6)-Co(2)-N(6) <sup>#4</sup>                | 86.98(12)  |                                              |            |

Symmetry transformations used to generate equivalent atoms: <sup>#1</sup> x-1, y, z; <sup>#2</sup> x, y-1, z; <sup>#3</sup> -x+2, -y+1, -z+1; <sup>#4</sup> -x+2, -y, -z+2.

**Table S4a.** Selected bond distances (Å) and angles (°) for **4**.

|                                               |            |                                 |            |
|-----------------------------------------------|------------|---------------------------------|------------|
| Co(1)-N(3) <sup>#1</sup>                      | 2.1023(19) | Co(1)-O(1W)                     | 2.1162(17) |
| Co(1)-O(1)                                    | 2.1379(13) | Co(2)-O(2W)                     | 2.0399(17) |
| Co(2)-O(4)                                    | 2.1079(15) | Co(2)-O(3)                      | 2.1641(14) |
| N(3) <sup>#1</sup> -Co(1)-O(1W) <sup>#3</sup> | 93.69(8)   | N(3) <sup>#1</sup> -Co(1)-O(1W) | 86.31(8)   |
| N(3) <sup>#1</sup> -Co(1)-O(1)                | 89.01(6)   | O(1W)-Co(1)-O(1)                | 87.76(6)   |
| N(3) <sup>#2</sup> -Co(1)-O(1)                | 90.99(6)   | O(1W) <sup>#3</sup> -Co(1)-O(1) | 92.24(6)   |
| O(2W) <sup>#4</sup> -Co(2)-O(4)               | 90.15(7)   | O(2W)-Co(2)-O(4)                | 89.85(7)   |
| O(2W) <sup>#4</sup> -Co(2)-O(3)               | 92.68(7)   | O(4)-Co(2)-O(3) <sup>#4</sup>   | 118.45(6)  |
| O(2W)-Co(2)-O(3)                              | 87.32(7)   | O(4)-Co(2)-O(3)                 | 61.55(6)   |

Symmetry transformations used to generate equivalent atoms: <sup>#1</sup> -x, -y, -z+1; <sup>#2</sup> x+1, y, z; <sup>#3</sup> -x+1, -y, -z+1; <sup>#4</sup> -x+1, -y+2, -z+2.

**Table S4b.** Hydrogen bonds for **4** (Å and °).

| D-H...A                          | d(D-H)    | d(H...A)  | d(D...A) | <(DHA) |
|----------------------------------|-----------|-----------|----------|--------|
| O(1W)-H(1A)...O(2) <sup>#3</sup> | 0.851(9)  | 1.798(11) | 2.629(2) | 165(3) |
| O(1W)-H(1B)...O(3) <sup>#6</sup> | 0.856(9)  | 2.007(10) | 2.856(2) | 171(3) |
| O(2W)-H(2A)...O(1) <sup>#7</sup> | 0.854(10) | 1.935(11) | 2.786(2) | 174(3) |
| O(2W)-H(2B)...O(6)               | 0.853(10) | 1.795(10) | 2.643(3) | 173(3) |

Symmetry transformations used to generate equivalent atoms: <sup>#3</sup> -x+1, -y, -z+1; <sup>#6</sup> x, y-1, z; <sup>#7</sup> x, y+1, z.

**Table S5a.** Selected bond distances (Å) and angles (°) for **5**.

|                                               |            |                                               |            |
|-----------------------------------------------|------------|-----------------------------------------------|------------|
| Co(1)-O(7)                                    | 2.049(3)   | Co(1)-O(11) <sup>#1</sup>                     | 2.052(3)   |
| Co(1)-O(2)                                    | 2.057(3)   | Co(1)-N(3) <sup>#2</sup>                      | 2.141(3)   |
| Co(1)-O(1W)                                   | 2.172(4)   | Co(1)-O(8) <sup>#3</sup>                      | 2.209(3)   |
| Co(2)-O(11)                                   | 2.017(3)   | Co(2)-O(1)                                    | 2.108(3)   |
| Co(2)-O(8) <sup>#4</sup>                      | 2.204(3)   | Co(3)-O(4) <sup>#5</sup>                      | 1.987(3)   |
| Co(3)-O(6) <sup>#1</sup>                      | 2.027(3)   | Co(3)-O(11)                                   | 2.031(3)   |
| Co(3)-N(6) <sup>#6</sup>                      | 2.126(4)   | Co(3)-O(9) <sup>#3</sup>                      | 2.162(3)   |
| Co(3)-O(1)                                    | 2.333(3)   |                                               |            |
| O(7)-Co(1)-O(11) <sup>#1</sup>                | 95.67(11)  | O(7)-Co(1)-O(2)                               | 173.83(11) |
| O(11) <sup>#1</sup> -Co(1)-O(2)               | 90.49(11)  | O(7)-Co(1)-N(3) <sup>#2</sup>                 | 84.85(12)  |
| O(11) <sup>#1</sup> -Co(1)-N(3) <sup>#2</sup> | 173.60(13) | O(2)-Co(1)-N(3) <sup>#2</sup>                 | 89.00(12)  |
| O(7)-Co(1)-O(1W)                              | 89.90(14)  | O(11) <sup>#1</sup> -Co(1)-O(1W)              | 88.52(13)  |
| O(2)-Co(1)-O(1W)                              | 90.00(14)  | N(3) <sup>#2</sup> -Co(1)-O(1W)               | 85.10(14)  |
| O(7)-Co(1)-O(8) <sup>#3</sup>                 | 94.76(12)  | O(11) <sup>#1</sup> -Co(1)-O(8) <sup>#3</sup> | 80.76(10)  |
| O(2)-Co(1)-O(8) <sup>#3</sup>                 | 86.46(11)  | N(3) <sup>#2</sup> -Co(1)-O(8) <sup>#3</sup>  | 105.57(12) |
| O(1W)-Co(1)-O(8) <sup>#3</sup>                | 168.67(12) | O(11) <sup>#1</sup> -Co(2)-O(1)               | 93.70(11)  |
| O(11)-Co(2)-O(1)                              | 86.30(11)  | O(11)-Co(2)-O(8) <sup>#4</sup>                | 81.63(10)  |
| O(1)-Co(2)-O(8) <sup>#4</sup>                 | 93.20(10)  | O(11)-Co(2)-O(8) <sup>#3</sup>                | 98.37(10)  |
| O(1)-Co(2)-O(8) <sup>#3</sup>                 | 86.80(10)  | O(4) <sup>#5</sup> -Co(3)-O(6) <sup>#1</sup>  | 101.82(12) |
| O(4) <sup>#5</sup> -Co(3)-O(11)               | 160.52(12) | O(6) <sup>#1</sup> -Co(3)-O(11)               | 93.32(11)  |
| O(4) <sup>#5</sup> -Co(3)-N(6) <sup>#6</sup>  | 93.27(13)  | O(6) <sup>#1</sup> -Co(3)-N(6) <sup>#6</sup>  | 92.21(14)  |
| O(11)-Co(3)-N(6) <sup>#6</sup>                | 98.37(13)  | O(4) <sup>#5</sup> -Co(3)-O(9) <sup>#3</sup>  | 81.73(12)  |
| O(6) <sup>#1</sup> -Co(3)-O(9) <sup>#3</sup>  | 176.33(11) | O(11)-Co(3)-O(9) <sup>#3</sup>                | 83.41(10)  |
| N(6) <sup>#6</sup> -Co(3)-O(9) <sup>#3</sup>  | 86.64(13)  | O(4) <sup>#5</sup> -Co(3)-O(1)                | 87.36(11)  |
| O(6) <sup>#1</sup> -Co(3)-O(1)                | 90.59(12)  | O(11)-Co(3)-O(1)                              | 80.24(10)  |
| N(6) <sup>#6</sup> -Co(3)-O(1)                | 176.94(12) | O(9) <sup>#3</sup> -Co(3)-O(1)                | 90.49(10)  |

Symmetry transformations used to generate equivalent atoms: <sup>#1</sup> -x+2, -y, -z+2; <sup>#2</sup> x-1, y, z; <sup>#3</sup> -x+1, -y, -z+2; <sup>#4</sup> x+1, y, z; <sup>#5</sup> -x+2, -y, -z+3; <sup>#6</sup> x+1, y-1, z+1.

**Table S5b.** Hydrogen bonds for **5** (Å and °).

| D-H...A                            | d(D-H)    | d(H...A)  | d(D...A) | <(DHA) |
|------------------------------------|-----------|-----------|----------|--------|
| O(11)-H(11A)...O(12) <sup>#1</sup> | 0.847(11) | 2.137(18) | 2.957(5) | 163(4) |
| O(1W)-H(1A)...O(12)                | 0.846(11) | 1.860(15) | 2.691(6) | 167(5) |

O(1W)-H(1B)...O(13) 0.845(10) 1.96(2) 2.788(11) 166(6)

Symmetry transformations used to generate equivalent atoms: <sup>#1</sup> -x+2, -y, -z+2.

**Table S6a.** Selected bond distances (Å) and angles (°) for **6**.

|                                              |            |                                              |            |
|----------------------------------------------|------------|----------------------------------------------|------------|
| Cd(1)-O(1)                                   | 2.235(2)   | Cd(1)-O(2) <sup>#1</sup>                     | 2.278(2)   |
| Cd(1)-N(3) <sup>#2</sup>                     | 2.285(3)   | Cd(1)-O(4) <sup>#3</sup>                     | 2.353(2)   |
| Cd(1)-O(3) <sup>#3</sup>                     | 2.376(2)   | Cd(1)-O(6)                                   | 2.383(3)   |
| O(1)-Cd(1)-O(2) <sup>#1</sup>                | 114.99(9)  | O(1)-Cd(1)-N(3) <sup>#2</sup>                | 98.05(10)  |
| O(2) <sup>#1</sup> -Cd(1)-N(3) <sup>#2</sup> | 91.41(10)  | O(1)-Cd(1)-O(4) <sup>#3</sup>                | 90.69(8)   |
| O(2) <sup>#1</sup> -Cd(1)-O(4) <sup>#3</sup> | 149.46(8)  | N(3) <sup>#2</sup> -Cd(1)-O(4) <sup>#3</sup> | 101.49(10) |
| O(1)-Cd(1)-O(3) <sup>#3</sup>                | 145.85(8)  | O(2) <sup>#1</sup> -Cd(1)-O(3) <sup>#3</sup> | 97.94(8)   |
| N(3) <sup>#2</sup> -Cd(1)-O(3) <sup>#3</sup> | 89.54(9)   | O(4) <sup>#3</sup> -Cd(1)-O(3) <sup>#3</sup> | 55.16(7)   |
| O(1)-Cd(1)-O(6)                              | 91.53(10)  | O(2) <sup>#1</sup> -Cd(1)-O(6)               | 82.20(10)  |
| N(3) <sup>#2</sup> -Cd(1)-O(6)               | 170.10(10) | O(4) <sup>#3</sup> -Cd(1)-O(6)               | 80.80(10)  |
| O(3) <sup>#3</sup> -Cd(1)-O(6)               | 83.88(9)   |                                              |            |

Symmetry transformations used to generate equivalent atoms: <sup>#1</sup> -x+1, -y, -z+1; <sup>#2</sup> x, y-1, z+1; <sup>#3</sup> x, y, z+1.

**Table S7a.** Selected bond distances (Å) and angles (°) for **7**.

|                                              |            |                                              |            |
|----------------------------------------------|------------|----------------------------------------------|------------|
| Cd(1)-O(3) <sup>#1</sup>                     | 2.289(4)   | Cd(1)-O(4) <sup>#2</sup>                     | 2.298(3)   |
| Cd(1)-O(6)                                   | 2.320(4)   | Cd(1)-N(3) <sup>#3</sup>                     | 2.340(5)   |
| Cd(1)-O(1)                                   | 2.362(4)   | Cd(1)-O(2)                                   | 2.401(4)   |
| O(3) <sup>#1</sup> -Cd(1)-O(4) <sup>#2</sup> | 102.43(13) | O(3) <sup>#1</sup> -Cd(1)-O(6)               | 129.09(16) |
| O(4) <sup>#2</sup> -Cd(1)-O(6)               | 83.12(14)  | O(3) <sup>#1</sup> -Cd(1)-N(3) <sup>#3</sup> | 82.32(16)  |
| O(4) <sup>#2</sup> -Cd(1)-N(3) <sup>#3</sup> | 158.20(15) | O(6)-Cd(1)-N(3) <sup>#3</sup>                | 77.64(17)  |
| O(3) <sup>#1</sup> -Cd(1)-O(1)               | 84.51(14)  | O(4) <sup>#2</sup> -Cd(1)-O(1)               | 102.85(15) |
| O(6)-Cd(1)-O(1)                              | 144.35(16) | N(3) <sup>#3</sup> -Cd(1)-O(1)               | 98.77(17)  |
| O(3) <sup>#1</sup> -Cd(1)-O(2)               | 136.89(13) | O(4) <sup>#2</sup> -Cd(1)-O(2)               | 98.94(13)  |
| O(6)-Cd(1)-O(2)                              | 90.17(16)  | N(3) <sup>#3</sup> -Cd(1)-O(2)               | 91.33(16)  |
| O(1)-Cd(1)-O(2)                              | 54.25(13)  |                                              |            |

Symmetry transformations used to generate equivalent atoms: <sup>#1</sup> -x+1, y-1/2, -z+1/2; <sup>#2</sup> x, -y+3/2, z+1/2; <sup>#3</sup> x-1, y, z.

**Table S8a.** Selected bond distances (Å) and angles (°) for **8**.

|             |          |            |          |
|-------------|----------|------------|----------|
| Cd(1)-O(2W) | 2.297(3) | Cd(1)-O(1) | 2.342(2) |
|-------------|----------|------------|----------|

|                                              |           |                                              |            |
|----------------------------------------------|-----------|----------------------------------------------|------------|
| Cd(1)-N(3) <sup>#1</sup>                     | 2.346(3)  | Cd(1)-O(1W)                                  | 2.348(3)   |
| Cd(1)-O(3) <sup>#2</sup>                     | 2.362(2)  | Cd(1)-O(2)                                   | 2.408(2)   |
| Cd(1)-O(4) <sup>#2</sup>                     | 2.433(2)  |                                              |            |
| O(2W)-Cd(1)-O(1)                             | 100.71(9) | O(2W)-Cd(1)-N(3) <sup>#1</sup>               | 84.02(10)  |
| O(1)-Cd(1)-N(3) <sup>#1</sup>                | 86.10(8)  | O(2W)-Cd(1)-O(1W)                            | 171.72(11) |
| O(1)-Cd(1)-O(1W)                             | 84.65(9)  | N(3) <sup>#1</sup> -Cd(1)-O(1W)              | 90.11(11)  |
| O(2W)-Cd(1)-O(3) <sup>#2</sup>               | 91.10(9)  | O(1)-Cd(1)-O(3) <sup>#2</sup>                | 166.24(8)  |
| N(3) <sup>#1</sup> -Cd(1)-O(3) <sup>#2</sup> | 88.16(8)  | O(1W)-Cd(1)-O(3) <sup>#2</sup>               | 82.86(9)   |
| O(2W)-Cd(1)-O(2)                             | 93.92(10) | O(1)-Cd(1)-O(2)                              | 54.78(7)   |
| N(3) <sup>#1</sup> -Cd(1)-O(2)               | 139.85(9) | O(1W)-Cd(1)-O(2)                             | 94.33(10)  |
| O(3) <sup>#2</sup> -Cd(1)-O(2)               | 131.99(8) | O(2W)-Cd(1)-O(4) <sup>#2</sup>               | 88.20(9)   |
| O(1)-Cd(1)-O(4) <sup>#2</sup>                | 132.19(7) | N(3) <sup>#1</sup> -Cd(1)-O(4) <sup>#2</sup> | 141.71(8)  |
| O(1W)-Cd(1)-O(4) <sup>#2</sup>               | 92.85(9)  | O(3) <sup>#2</sup> -Cd(1)-O(4) <sup>#2</sup> | 54.48(7)   |
| O(2)-Cd(1)-O(4) <sup>#2</sup>                | 77.97(7)  |                                              |            |

Symmetry transformations used to generate equivalent atoms: <sup>#1</sup> -x, y-1/2, -z+1/2; <sup>#2</sup> -x+1, y-1/2, -z+3/2.

**Table S8b.** Hydrogen bonds for **8** (Å and °).

| D-H...A                           | d(D-H)    | d(H...A)  | d(D...A)  | <(DHA) |
|-----------------------------------|-----------|-----------|-----------|--------|
| O(1W)-H(1A)...O(4W) <sup>#6</sup> | 0.846(10) | 2.17(2)   | 2.960(9)  | 156(4) |
| O(1W)-H(1B)...O(4) <sup>#7</sup>  | 0.842(10) | 2.071(14) | 2.900(3)  | 168(5) |
| O(2W)-H(2A)...O(3W) <sup>#8</sup> | 0.77(4)   | 1.97(5)   | 2.698(4)  | 156(5) |
| O(2W)-H(2B)...O(1) <sup>#9</sup>  | 0.73(4)   | 1.97(4)   | 2.702(3)  | 177(5) |
| O(3W)-H(3A)...O(5) <sup>#7</sup>  | 0.849(10) | 2.25(2)   | 3.000(3)  | 148(4) |
| O(3W)-H(3B)...O(4) <sup>#2</sup>  | 0.851(10) | 1.992(12) | 2.840(4)  | 175(5) |
| O(4W)-H(4A)...O(3) <sup>#7</sup>  | 0.849(10) | 2.12(3)   | 2.904(10) | 153(6) |

Symmetry transformations used to generate equivalent atoms: <sup>#2</sup> -x+1, y-1/2, -z+3/2; <sup>#6</sup> -x+1, y-1/2, -z+1/2; <sup>#7</sup> -x+1, -y+1, -z+1; <sup>#8</sup> x-1, y, z; <sup>#9</sup> x, -y+1/2, z+1/2.

**Table S9a.** Selected bond distances (Å) and angles (°) for **9**.

|                          |            |                                |            |
|--------------------------|------------|--------------------------------|------------|
| Mn(1)-O(1W)              | 2.1712(18) | Mn(1)-O(2W)                    | 2.215(2)   |
| Mn(1)-O(4) <sup>#1</sup> | 2.2580(16) | Mn(1)-O(2)                     | 2.2918(17) |
| Mn(1)-N(3) <sup>#2</sup> | 2.2931(19) | Mn(1)-O(3) <sup>#1</sup>       | 2.3351(18) |
| Mn(1)-O(1)               | 2.3523(16) |                                |            |
| O(1W)-Mn(1)-O(2W)        | 174.33(9)  | O(1W)-Mn(1)-O(4) <sup>#1</sup> | 98.49(7)   |

|                                              |           |                                |           |
|----------------------------------------------|-----------|--------------------------------|-----------|
| O(2W)-Mn(1)-O(4) <sup>#1</sup>               | 85.08(7)  | O(1W)-Mn(1)-O(2)               | 92.34(7)  |
| O(2W)-Mn(1)-O(2)                             | 83.42(8)  | O(4) <sup>#1</sup> -Mn(1)-O(2) | 165.45(6) |
| O(1W)-Mn(1)-N(3) <sup>#2</sup>               | 85.11(7)  | O(2W)-Mn(1)-N(3) <sup>#2</sup> | 90.83(9)  |
| O(4) <sup>#1</sup> -Mn(1)-N(3) <sup>#2</sup> | 85.13(7)  | O(2)-Mn(1)-N(3) <sup>#2</sup>  | 86.15(7)  |
| O(1W)-Mn(1)-O(3) <sup>#1</sup>               | 92.44(7)  | O(2W)-Mn(1)-O(3) <sup>#1</sup> | 93.20(9)  |
| O(4) <sup>#1</sup> -Mn(1)-O(3) <sup>#1</sup> | 56.70(6)  | O(2)-Mn(1)-O(3) <sup>#1</sup>  | 132.84(6) |
| N(3) <sup>#2</sup> -Mn(1)-O(3) <sup>#1</sup> | 141.01(7) | O(1W)-Mn(1)-O(1)               | 87.38(6)  |
| O(2W)-Mn(1)-O(1)                             | 93.34(8)  | O(4) <sup>#1</sup> -Mn(1)-O(1) | 133.77(6) |
| O(2)-Mn(1)-O(1)                              | 56.05(6)  | N(3) <sup>#2</sup> -Mn(1)-O(1) | 141.09(6) |
| O(3) <sup>#1</sup> -Mn(1)-O(1)               | 77.35(6)  |                                |           |

Symmetry transformations used to generate equivalent atoms: <sup>#1</sup> -x+1, y+1/2, -z+3/2; <sup>#2</sup> x-1, y, z-1.

**Table S9b.** Hydrogen bonds for **9** (Å and °).

| D-H...A                           | d(D-H)    | d(H...A)  | d(D...A) | <(DHA) |
|-----------------------------------|-----------|-----------|----------|--------|
| O(2W)-H(2B)...O(4W)               | 0.79(4)   | 2.21(4)   | 2.950(7) | 156(4) |
| O(3W)-H(3A)...O(1)                | 0.849(10) | 1.982(10) | 2.830(3) | 178(4) |
| O(1W)-H(1A)...O(4) <sup>#6</sup>  | 0.851(10) | 1.853(10) | 2.703(2) | 177(3) |
| O(1W)-H(1B)...O(3W) <sup>#7</sup> | 0.849(10) | 1.863(12) | 2.698(3) | 167(3) |
| O(2W)-H(2A)...O(1) <sup>#8</sup>  | 0.76(4)   | 2.12(4)   | 2.876(3) | 173(4) |
| O(3W)-H(3B)...O(5) <sup>#8</sup>  | 0.842(10) | 2.22(2)   | 2.974(3) | 149(3) |
| O(4W)-H(4A)...O(2) <sup>#5</sup>  | 0.88(6)   | 2.07(6)   | 2.924(8) | 162(6) |

Symmetry transformations used to generate equivalent atoms: <sup>#5</sup> -x+1, -y+1, -z+1; <sup>#6</sup> -x+1, -y+1, -z+2; <sup>#7</sup> x-1, y, z; <sup>#8</sup> x, -y+3/2, z-1/2.

**Table S10a.** Selected bond distances (Å) and angles (°) for **10**.

|                                              |            |                                |            |
|----------------------------------------------|------------|--------------------------------|------------|
| Mn(1)-O(4) <sup>#1</sup>                     | 2.0821(19) | Mn(1)-O(3) <sup>#2</sup>       | 2.1005(18) |
| Mn(1)-O(7)                                   | 2.142(3)   | Mn(1)-O(6)                     | 2.208(2)   |
| Mn(1)-O(1)                                   | 2.2085(18) | Mn(1)-O(2)                     | 2.3546(18) |
| O(4) <sup>#1</sup> -Mn(1)-O(3) <sup>#2</sup> | 113.03(7)  | O(4) <sup>#1</sup> -Mn(1)-O(7) | 90.89(13)  |
| O(3) <sup>#2</sup> -Mn(1)-O(7)               | 95.23(13)  | O(4) <sup>#1</sup> -Mn(1)-O(6) | 86.12(9)   |
| O(3) <sup>#2</sup> -Mn(1)-O(6)               | 93.48(9)   | O(7)-Mn(1)-O(6)                | 171.28(13) |
| O(4) <sup>#1</sup> -Mn(1)-O(1)               | 153.63(7)  | O(3) <sup>#2</sup> -Mn(1)-O(1) | 93.22(6)   |
| O(7)-Mn(1)-O(1)                              | 89.04(13)  | O(6)-Mn(1)-O(1)                | 90.01(8)   |
| O(4) <sup>#1</sup> -Mn(1)-O(2)               | 96.35(7)   | O(3) <sup>#2</sup> -Mn(1)-O(2) | 150.60(7)  |

|                 |           |                 |          |
|-----------------|-----------|-----------------|----------|
| O(7)-Mn(1)-O(2) | 84.88(13) | O(6)-Mn(1)-O(2) | 87.31(9) |
| O(1)-Mn(1)-O(2) | 57.38(6)  |                 |          |

Symmetry transformations used to generate equivalent atoms: <sup>#1</sup> -x-1, y-1/2, -z+3/2; <sup>#2</sup> x, -y-3/2, z-1/2.

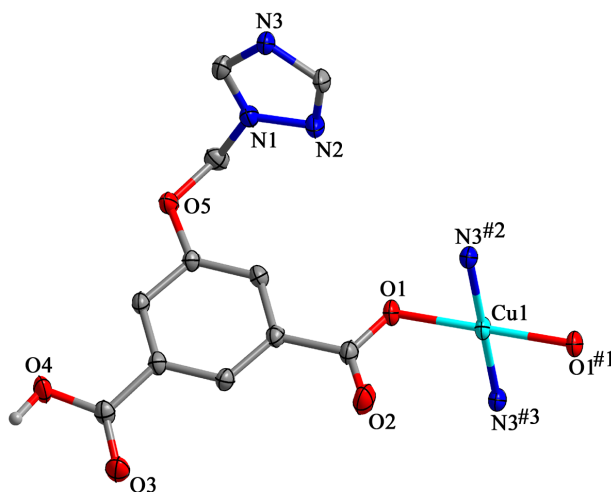

**Fig. S1.** ORTEP view of **2** showing the local coordination environment of Cu(II) atom with DMA molecule omitted for clarity (30% probability displacement ellipsoids). Symmetry codes: <sup>#1</sup> -x+2, -y, -z+2; <sup>#2</sup> -x+1, -y, -z+2; <sup>#3</sup> x+1, y, z.

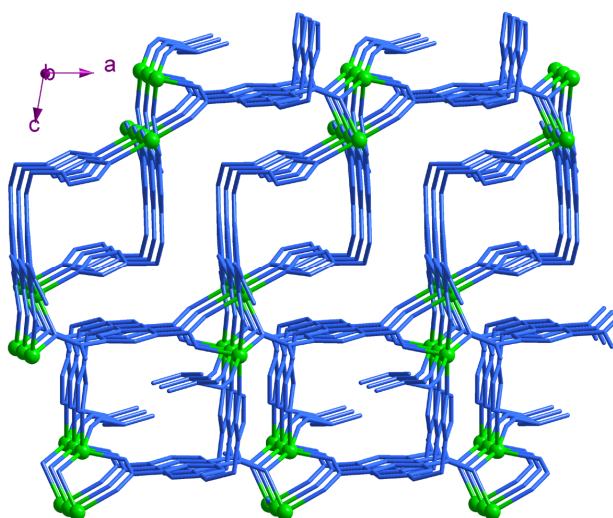

**Fig. S2.** View of the 3D framework of **3**.



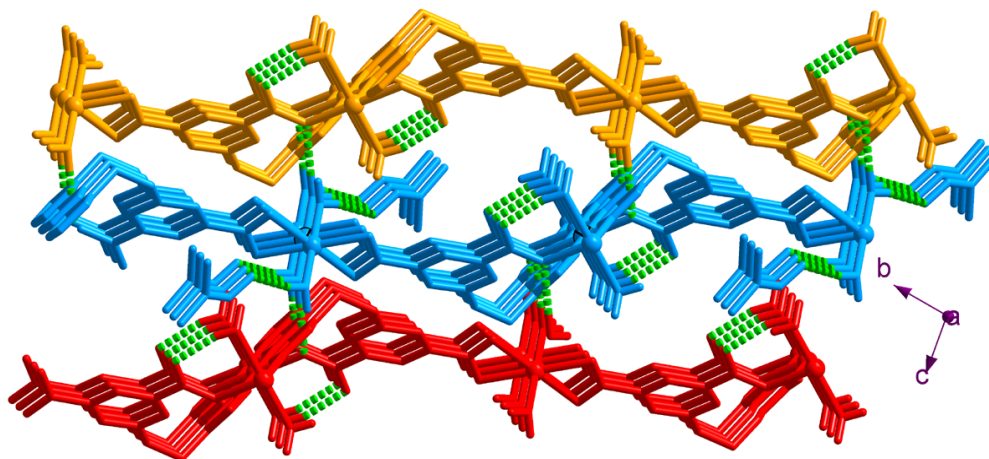

**Fig. S3.** The 3D supramolecular architecture formed through hydrogen bonds in **4**.

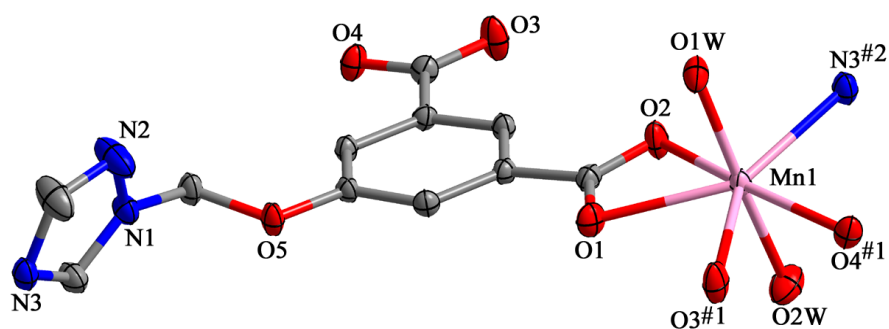

**Fig. S4.** ORTEP view of **9** showing the local coordination environment of Mn(II) atom with hydrogen atoms and free water molecules omitted for clarity (30% probability displacement ellipsoids). Symmetry codes: #1  $-x+1, y+1/2, -z+3/2$ ; #2  $x-1, y, z-1$ .

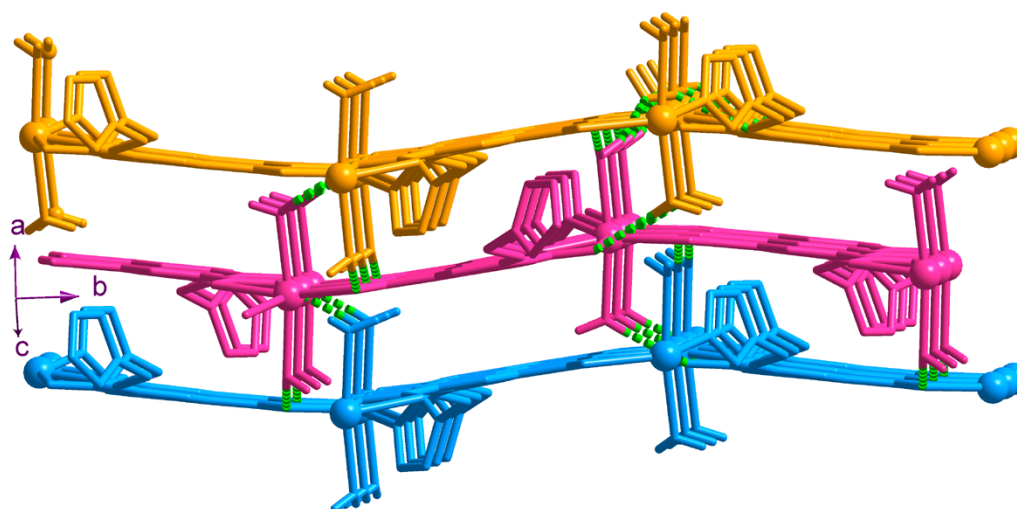

**Fig. S5.** The 3D supramolecular architecture formed by hydrogen bonding interactions in **8**.

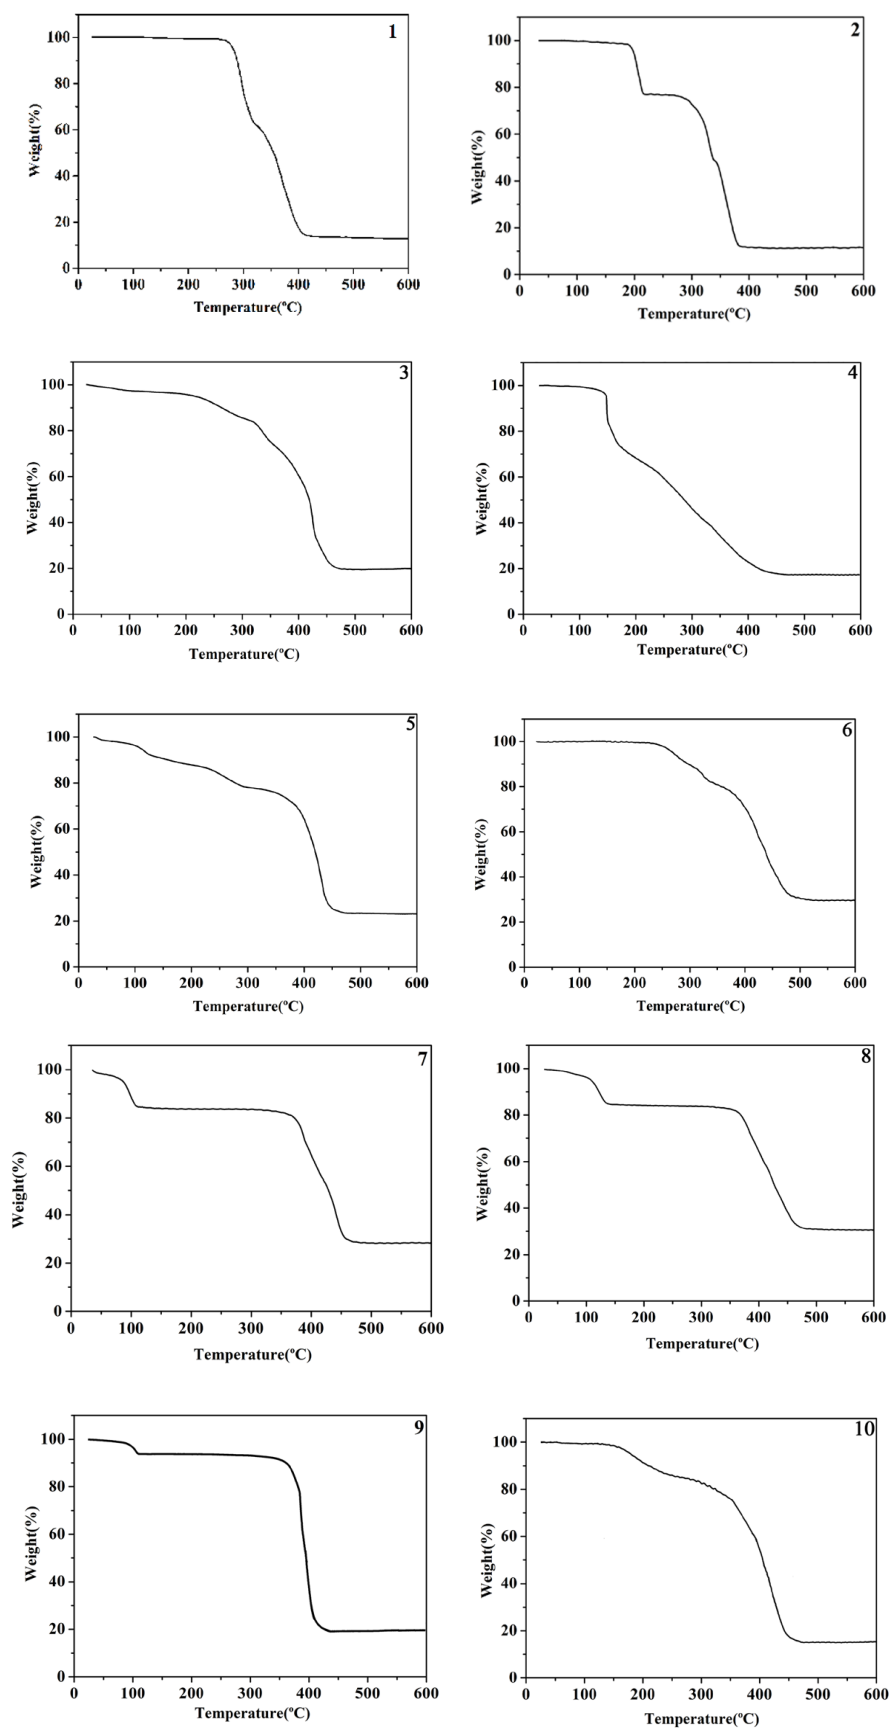

Fig. S6. TGA curves of compounds 1–10.

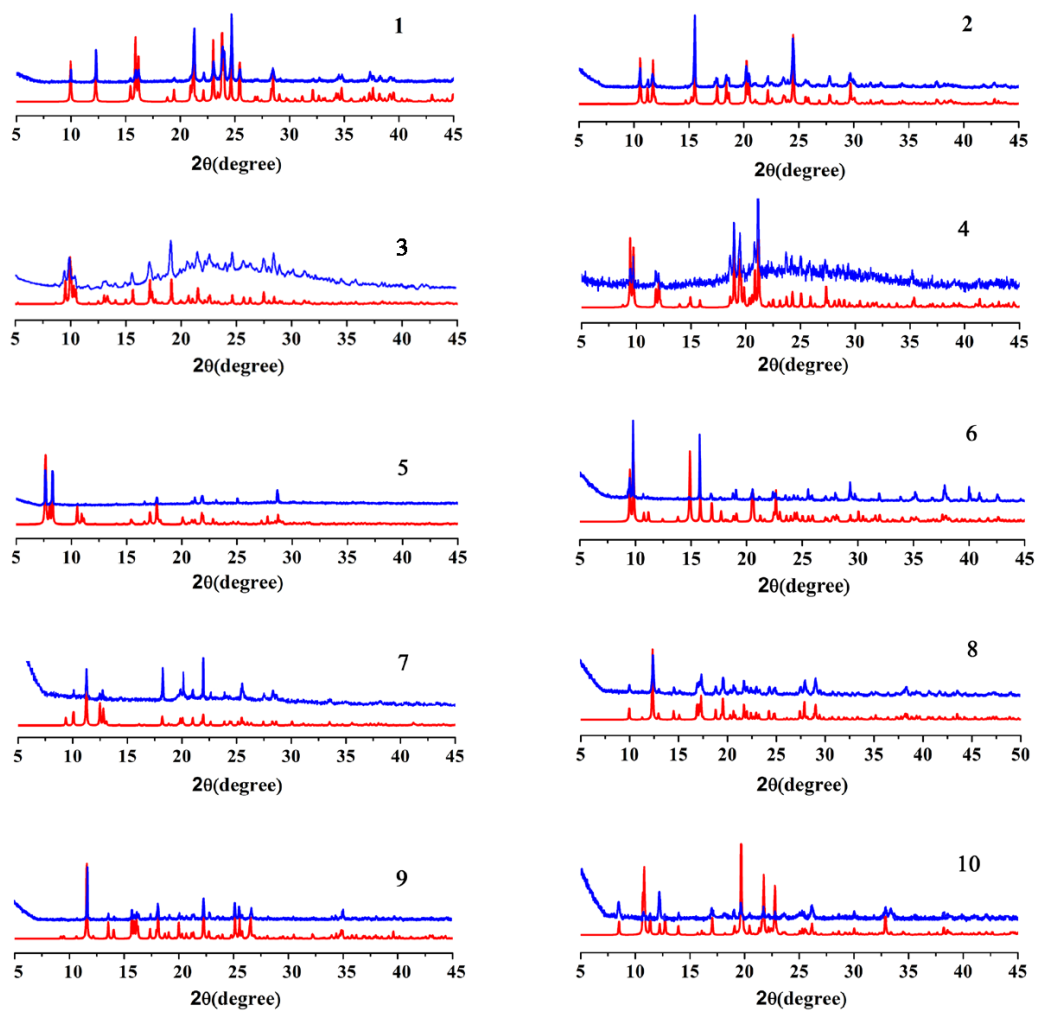

**Fig. S7.** Simulated (red) and experimental (blue) PXRD patterns of **1–10**.
